# Supplementary material for: Methanesulfonic acid-based electrode-decoupled vanadium–cerium redox flow battery exhibits significantly improved capacity and cycle life
Source: Royal Society of Chemistry journal article supplement (doi:10.1039/c9se00286c), 2019-01-01
Supplement: c9se00286c1.pdf [file c9se00286c1.pdf]

## Supporting Information

### **Methanesulfonic acid-based Electrode-decoupled Vanadium-Cerium Redox Flow Battery Exhibits Significantly Improved Capacity and Cycle Life**

Shrihari Sankarasubramanian, Yunzhu Zhang, Vijay Ramani<sup>z</sup>

Center for Solar Energy and Energy Storage, Department of Energy, Environmental and Chemical Engineering, Washington University in St. Louis, One Brookings Dr., St. Louis, MO 63130, USA

<sup>z</sup> Corresponding Author's email: [ramani@wustl.edu](mailto:ramani@wustl.edu)

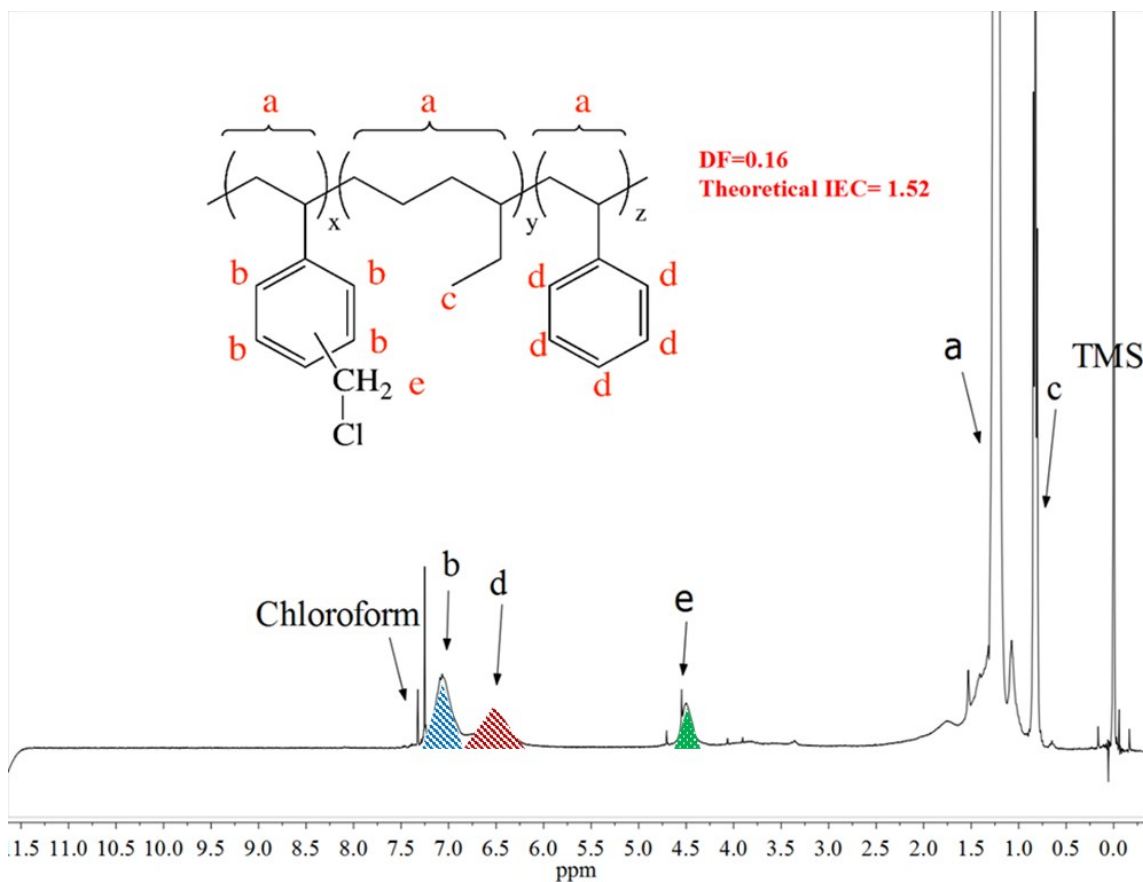

**Figure S1.** <sup>1</sup>H NMR spectrum of CM-SEBS30. Peaks a and c - protons on aliphatic backbone, Peaks b and d - protons the aromatic ring. The new peak e demonstrated the occurrence of the chloromethylation reaction. The degree of functionalization (DF) of CM-SEBS30 was calculated by using equation:

$$\frac{\frac{Area(e)}{2}}{Area(b) + \frac{Area(e)}{2}} \times 0.3$$

$$\frac{\quad}{5}$$

(S1)

The <sup>1</sup>H NMR experiment was performed in chloroform-d with trimethyl silane (TMS) internal standard for calibrating the chemical shift of <sup>1</sup>H.

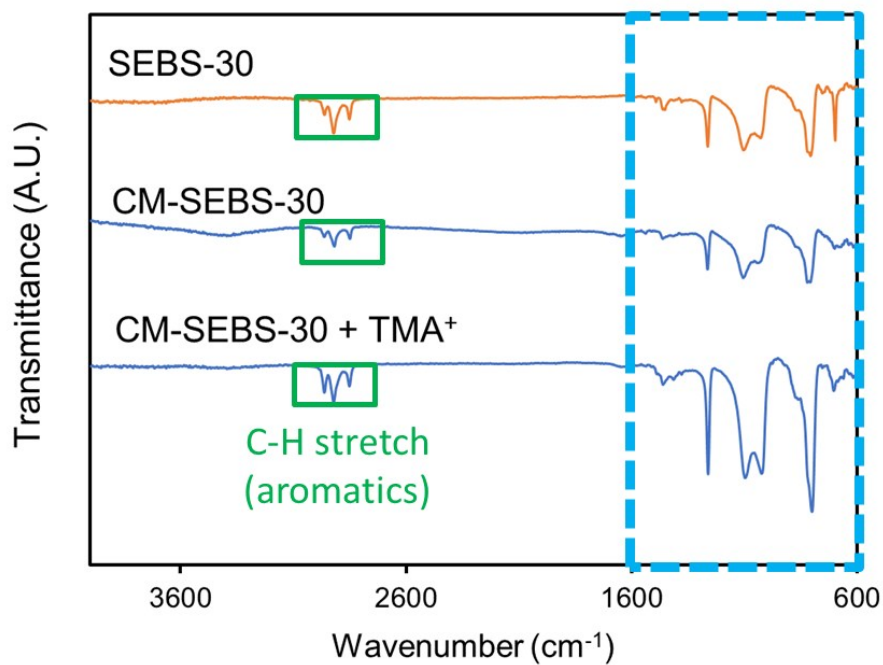

(a)

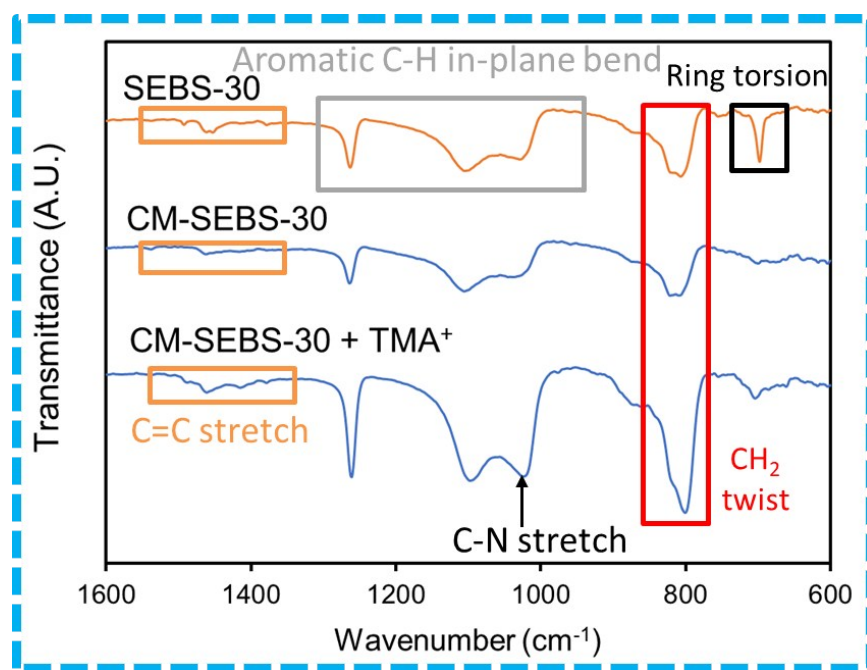

(b)

**Figure S2.** FTIR-ATR spectra of the SEBS-30, CM-SEBS-30 and CM-SEBS-30-TMA.

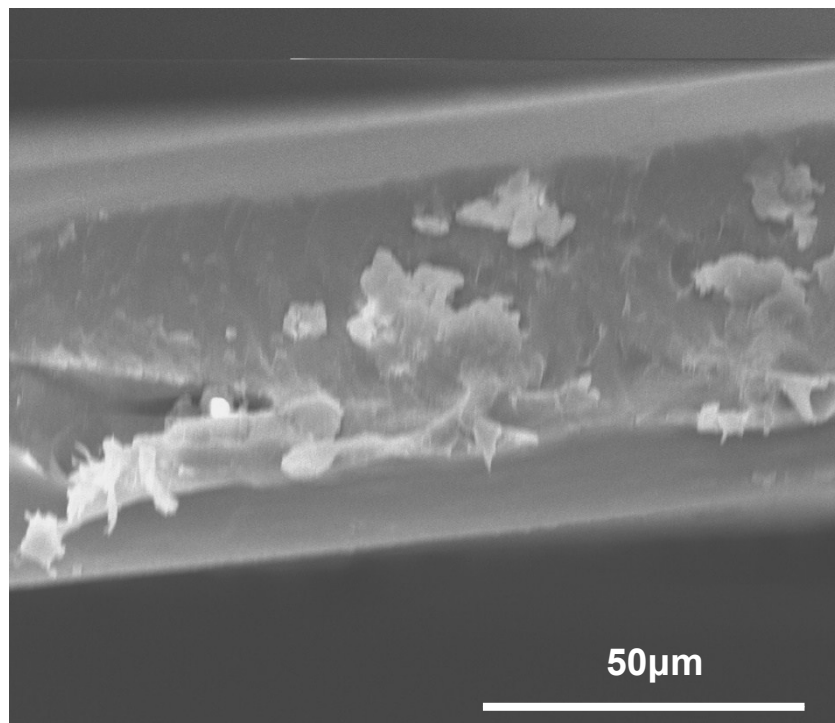

(a)

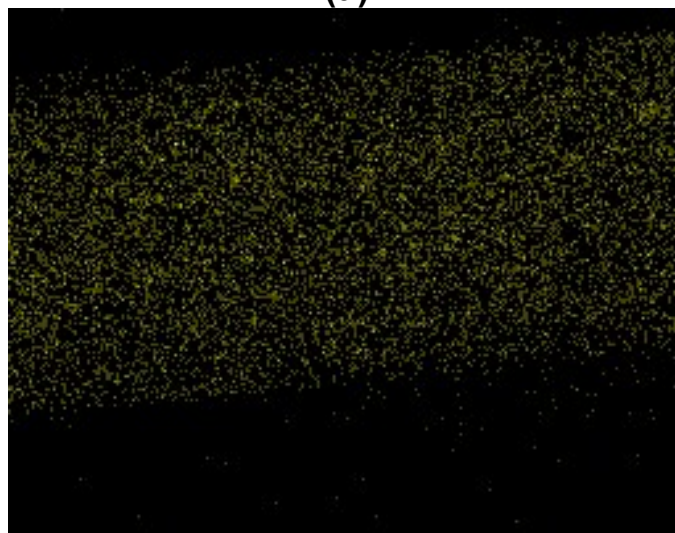

(b)

**Figure S3.** (a) SEM image of the cross-section of a CM-SEBS-30-TMA AEM separator, (b) Chlorine EDAX mapping spectra of the cross-section.

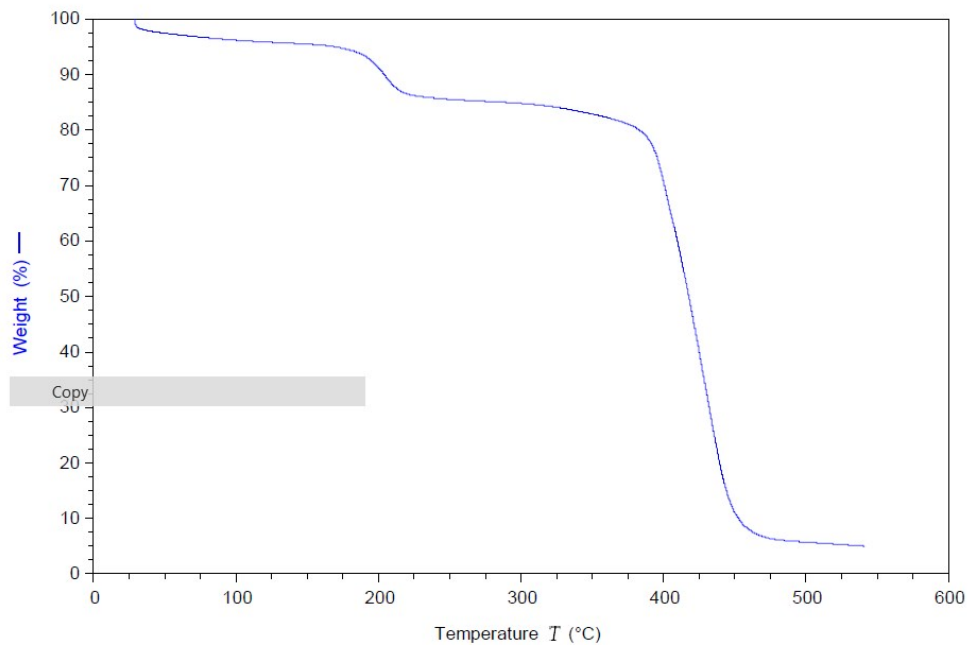

**Figure S4.** Thermogravimetric analysis of the CM-SEBS-30-TMA AEM separator.

**Table S1.** Summary of CM-SEBS-30-TMA properties

|                                                           | <b>SEBS30-TMA</b>     |
|-----------------------------------------------------------|-----------------------|
| <b>Experimental IEC (mmol/g)</b>                          | 1.35±0.02             |
| <b>Chloride conductivity (@ 70°C, mS/cm)</b>              | 18±3                  |
| <b>Ultimate tensile stress (MPa)</b>                      | 3.1±0.6               |
| <b>Elongation at break (%)</b>                            | 536±7                 |
| <b>Water uptake (%)</b>                                   | 52.0                  |
| <b>Swelling ratio (%)</b>                                 | 56.9                  |
| <b>Acid uptake (%)</b>                                    | 32.3                  |
| <b>Transport numbers (<math>t_{Cl^-}; t_{K^+}</math>)</b> | (0.87±0.02:0.13±0.02) |
